# Supplementary material for: Integrated analysis of lncRNA-miRNA-mRNA ceRNA network and the potential prognosis indicators in sarcomas
Source: Research Square preprint supplement (doi:10.21203/rs.3.rs-21667/v2), 2020-12-08
Supplement: Supplementary file 1 [file 2ad6b5efdf3d4d7dcfdd4623.xlsx]

## Sheet: Sheet1
Supplementary Table 8 The PPI nodes of DEGs that involving in ceRNA network.
Node1		Node2		Combined score
PRKAA2		PRKAB2		0.999
CAMK2A		CAMK2B		0.998
SF3B3		PRPF38A		0.997
PPP1R12B		PPP1CB		0.993
FKBP5		AR		0.988
DMD		SGCD		0.986
TRAF3		TRAF5		0.982
SOD2		GPX7		0.977
SORBS1		CBL		0.974
ESR1		IGF1		0.97
SDHD		CYCS		0.964
FKBP5		NR3C2		0.96
ADCY2		GNAL		0.959
SCN1B		ANK3		0.958
SRSF3		PRPF38A		0.957
SRSF10		SRSF3		0.956
FKBP5		ESR1		0.955
SRSF3		SF3B3		0.95
AR		NR3C2		0.945
NDUFS1		DLD		0.943
WIPF2		ACTR3		0.942
GNAI3		ADCY2		0.941
CBL		EPOR		0.939
DMD		TPM4		0.937
PRKAA2		CAMKK2		0.937
FBXO32		UBE2B		0.936
TPM4		TNNC1		0.934
CTNNA1		GJA1		0.934
ESR1		GNAI3		0.929
PPP1CB		PPP1R3B		0.929
SLC25A6		HSPA9		0.925
SRSF3		PAPOLA		0.924
SF3B3		PAPOLA		0.923
CAMKK2		PRKAB2		0.92
DMD		TNNC1		0.918
ACADSB		DLD		0.915
CBL		RHOQ		0.915
ANK3		ARF3		0.914
PPP1CB		CYCS		0.914
PRKCB		LPIN2		0.914
DCTN5		ANK3		0.913
PRPF38A		PAPOLA		0.91
LPL		LPIN2		0.91
CAMK2B		MAP2K3		0.91
CAMK2B		CAMKK2		0.909
CTNNA1		IGF1		0.909
AR		GNAI3		0.908
PPP1R12B		PRKG1		0.908
GNAI3		GNAL		0.906
SORBS1		TPM4		0.904
ESR1		GNAL		0.904
SORBS1		RHOQ		0.9
DCTN5		ARF3		0.9
NR3C2		DCTN5		0.9
CD55		ARF3		0.9
AR		DCTN5		0.9
CD55		ANK3		0.9
CBL		ACTR3		0.9
CD55		DCTN5		0.9
GYG1		PPP1R3B		0.896
TPM4		ACTC1		0.871
VAMP1		STX6		0.869
CTNNA3		CTNNA1		0.855
CAMK2A		PPP1CB		0.846
SOD2		CYCS		0.835
PPP1CB		PRKG1		0.83
AR		IGF1		0.822
TPM4		CFL2		0.815
CAMK2B		PPP1CB		0.815
PRKG1		ATP2B2		0.809
PDE4D		ADCY2		0.807
GYG1		PRKAB2		0.799
CAMK2A		ADCY2		0.767
PPP1CB		PAPOLA		0.766
AK4		PDE4D		0.761
CAMK2B		ADCY2		0.739
ADCY2		PRKCB		0.739
PRKAA2		PFKFB2		0.737
PFKFB2		PRKCB		0.732
RORA		BHLHE40		0.723
DCTN5		ACTC1		0.715
SRSF10		KDSR		0.71
CYCS		HSPA9		0.703
CFL2		ACTC1		0.702
DMD		ACTC1		0.696
IGF1		GJA1		0.685
FBXO32		IGF1		0.684
SLC25A6		CYCS		0.681
PAX7		DMD		0.679
CREB3L2		PRKCB		0.678
SCN1B		CAMK2A		0.674
PRKCB		RRAS2		0.674
PFKFB2		PRKAB2		0.665
TRAF5		NUMBL		0.662
SCN1B		CAMK2B		0.652
CAMK2A		PDE4D		0.649
CAMK2A		CREB3L2		0.643
CAMK2B		PDE4D		0.639
CYCS		DLD		0.638
PPP1CB		RPS6KA3		0.632
CAMK2A		DLGAP1		0.628
GNAI3		PRKCB		0.624
ACTC1		TNNC1		0.622
GJA1		ANK3		0.619
PRKG1		CREB3L2		0.616
ESR1		GJA1		0.614
PPP1CB		CREB3L2		0.613
SOD2		NDUFS1		0.61
PRKG1		ATP1B4		0.608
CAMK2B		CREB3L2		0.6
RPS6KA3		PPP1R3B		0.6
SOD2		HSPA9		0.598
AR		PRKG1		0.595
ESR1		AR		0.587
PRKCB		GJA1		0.582
MYLK3		TNNC1		0.579
GPX7		CYCS		0.579
MYLK3		ACTC1		0.557
FBXO32		PAX7		0.557
ESR1		RPS6KA3		0.557
TRAF3		REL		0.554
AR		REL		0.553
CAMK2A		ATP2B2		0.553
ACTC1		ACTR3		0.55
TPM4		ACTR3		0.543
AR		PRKCB		0.536
DMD		CTNNA1		0.534
LPL		CYCS		0.533
AR		CAMKK2		0.533
CFL2		ACTR3		0.531
CYCS		IGF1		0.527
FBXO32		DMD		0.524
AR		UBE2B		0.519
SDHD		DLD		0.515
ESR1		CYCS		0.512
GPX7		IGF1		0.51
NR3C2		KCNQ5		0.503
DMD		COL6A2		0.499
PAX7		SIX4		0.496
PAX7		IGF1		0.495
DMD		ANK3		0.49
GAMT		PRKAB2		0.489
PAFAH1B2		VAMP1		0.487
PPP1R12B		MYLK3		0.485
LPL		IGF1		0.484
SGCD		ACTC1		0.481
TRAF3		ESR1		0.481
NDUFS1		CYCS		0.473
ADCY2		ANK3		0.469
CTNNA3		SORBS1		0.464
ACTC1		GJA1		0.461
REL		TRAF5		0.457
SOD2		IGF1		0.455
TRAF3		RRAS2		0.454
DHX36		SF3B3		0.454
WIPF2		RHOQ		0.452
RAD23B		UBE2B		0.452
PPP1CB		PRKAA2		0.452
RPL28		KCNQ5		0.448
SOD2		DLD		0.445
PPP1CB		ARF3		0.445
HSPA9		DLD		0.445
AR		MID1		0.443
AR		SMARCC1		0.442
SMARCC1		PAPOLA		0.441
RPL28		RAD23B		0.44
PPP1CB		ACTC1		0.438
KDSR		ENPP4		0.438
PRKAA2		CYCS		0.437
PRKG1		PDE4D		0.433
CAMK2B		ATP2B2		0.43
ESR1		THRB		0.428
SOD2		LARS2		0.428
AR		CYCS		0.424
SRSF10		SF3B3		0.422
NDUFS1		SDHD		0.417
DMD		GJA1		0.416
THRB		TBL1X		0.415
ATP2B2		ATP1B4		0.414
GNAI3		CD55		0.414
NDUFS1		HSPA9		0.413
TRAF3		FKBP5		0.412
NDUFS1		SLC25A6		0.412
CAMK2B		DLGAP1		0.411
DLGAP1		LPIN2		0.406
SOD2		ESR1		0.405
