# Supplementary material for: Integrated analysis of lncRNA-miRNA-mRNA ceRNA network and the potential prognosis indicators in sarcomas
Source: Research Square preprint supplement (doi:10.21203/rs.3.rs-21667/v2), 2020-12-08
Supplement: Supplementary file 2 [file 60ebf9e6872b24e6db03303a.xlsx]

## Sheet: default
Supplementary Table 2 Significantly differentially expressed lncRNAs (DELs) between sarcoma patients and normal samples.
Upregulated DELs
LncRNA	LncRNA ID	LncRNA Description	LogFC	Fold Change	Style	P.Value	adj.P.Value
AFG3L1P	172	AFG3 like matrix AAA peptidase subunit 1, pseudogene	1.58827	3.00688	up	4.44219e-12	2.60653e-11
ANXA2P2	304	annexin A2 pseudogene 2	1.59678	3.02468	up	3.25764e-10	1.4147e-09
PMS2P5	5383	PMS1 homolog 2, mismatch repair system component pseudogene 5	1.97487	3.93094	up	1.15324e-17	1.74518e-16
PVT1	5820	Pvt1 oncogene (non-protein coding)	1.87329	3.66366	up	4.85781e-11	2.40951e-10
DLEU2	8847	deleted in lymphocytic leukemia 2 (non-protein coding)	2.59621	6.44033	up	2.97762e-12	1.7101e-11
HNRNPA3P1	10151	heterogeneous nuclear ribonucleoprotein A3 pseudogene 1	2.16179	4.72872	up	2.04104e-18	3.35225e-17
SMA4	11039	glucuronidase beta pseudogene	4.03343	17.5639	up	1.2106e-16	1.4075e-15
SNHG1	23642	small nucleolar RNA host gene 1	2.60016	6.06356	up	3.66167e-15	3.55725e-14
SNORD50A	26799	small nucleolar RNA, C/D box 50A	3.07845	8.44706	up	3.64588e-24	2.0424e-22
ASAP1-IT1	29065	ASAP1 intronic transcript 1	1.59413	3.01911	up	2.31632e-13	1.66441e-12
TUG1	55000	taurine up-regulated 1 (non-protein coding)	2.29098	5.01772	up	2.32418e-18	3.59892e-17
MEG3	55384	maternally expressed 3 (non-protein coding)	2.73177	7.03789	up	1.16699e-05	2.41612e-05
FAM45BP	55855	family with sequence similarity 45, member A pseudogene	1.65752	3.15473	up	1.12391e-20	3.05114e-19
LINC00869	57234	long intergenic non-protein coding RNA 869	1.8429	3.58732	up	7.02326e-08	2.15874e-07
GAS5	60674	growth arrest specific 5 (non-protein coding)	3.66062	13.3282	up	9.97201e-23	3.68333e-21
CENPBD1P1	65996	CENPB DNA-binding domains containing 1 pseudogene 1	2.0743	4.2114	up	9.63141e-17	1.23267e-15
KLF3-AS1	79667	KLF3 antisense RNA 1	1.96479	3.90357	up	1.61869e-06	4.10567e-06
SNHG7	84973	small nucleolar RNA host gene 7	2.11498	4.33183	up	8.54284e-13	5.6234e-12
SNHG12	85028	small nucleolar RNA host gene 12	2.79416	6.93626	up	2.68198e-22	1.00162e-20
GUSBP11	91316	glucuronidase, beta pseudogene 11	1.81797	3.52585	up	1.70535e-14	1.47485e-13
CYTOR	112597	cytoskeleton regulator RNA	2.07879	4.22452	up	5.2018e-11	2.56918e-10
EPB41L4A-AS1	114915	EPB41L4A antisense RNA 1	3.57978	11.957	up	1.70208e-19	3.64375e-18
AHSA2P	130872	activator of HSP90 ATPase homolog 2, pseudogene	1.85865	3.67955	up	2.95749e-10	1.26893e-09
OVOS2	144203	alpha-2-macroglobulin like 1 pseudogene	1.78271	3.44072	up	3.13454e-05	6.62726e-05
LINC00342	150759	long intergenic non-protein coding RNA 342	2.23074	4.69375	up	2.5072e-10	1.10755e-09
TAPT1-AS1	202020	TAPT1 antisense RNA 1 (head to head)	2.08286	4.23646	up	3.09047e-14	2.55862e-13
LINC00537	203274	long intergenic non-protein coding RNA 537	2.88196	7.37153	up	4.04592e-13	2.79589e-12
DKFZP586I1420	222161	uncharacterized protein DKFZp586I1420	1.78791	3.45315	up	5.09407e-13	3.46445e-12
TXLNGY	246126	taxilin gamma pseudogene, Y-linked	2.18226	4.53865	up	1.21397e-05	2.72236e-05
LOC285097	285097	uncharacterized FLJ38379	2.07407	4.21072	up	1.75739e-07	5.0917e-07
LINC00632	286411	long intergenic non-protein coding RNA 632	2.03791	4.1065	up	9.01269e-06	2.05758e-05
CA5BP1	340591	carbonic anhydrase 5B pseudogene 1	1.72367	3.30274	up	2.65433e-12	1.61538e-11
PSMA3-AS1	379025	PSMA3 antisense RNA 1	2.19307	4.57277	up	7.72229e-13	5.11096e-12
SNHG17	388796	small nucleolar RNA host gene 17	2.02661	4.11568	up	5.43438e-13	3.52483e-12
LOC389765	389765	kinesin family member 27 pseudogene	1.61658	3.06647	up	1.10823e-11	6.089e-11
LINC01002	399844	long intergenic non-protein coding RNA 1002	1.92421	3.79529	up	1.12877e-08	3.88906e-08
LINC02381	400043	long intergenic non-protein coding RNA 2381	1.8031	3.4897	up	6.30024e-14	4.94851e-13
LINC01000	402483	long intergenic non-protein coding RNA 1000	1.60982	3.05213	up	4.06314e-09	1.49749e-08
MGC70870	403340	C-terminal binding protein 2 pseudogene	1.60731	3.04683	up	2.90889e-11	1.49603e-10
BAIAP2-AS1	440465	BAIAP2 antisense RNA 1 (head to head)	2.8834	7.67242	up	1.25951e-23	6.29243e-22
ZFAS1	441951	ZNFX1 antisense RNA 1	3.42169	12.2703	up	1.56043e-13	1.04721e-12
JPX	554203	JPX transcript, XIST activator (non-protein coding)	2.23244	4.69928	up	6.07696e-13	4.0843e-12
LINC01296	642477	long intergenic non-protein coding RNA 1296	3.89234	14.8495	up	1.81585e-12	1.13621e-11
LOC642852	642852	uncharacterized LOC642852	2.2201	4.75414	up	1.06238e-13	7.67529e-13
LOC645166	645166	lymphocyte-specific protein 1 pseudogene	1.84444	3.59113	up	5.58549e-11	2.74382e-10
LINC00461	645323	long intergenic non-protein coding RNA 461	1.64879	3.1357	up	0.000308723	0.000567662
GUSBP3	653188	glucuronidase, beta pseudogene 3	4.35781	20.5037	up	3.11012e-20	7.68396e-19
GTF2H2B	653238	general transcription factor IIH subunit 2B (pseudogene)	2.62515	6.16949	up	7.49848e-11	3.61056e-10
SNORD104	692227	small nucleolar RNA, C/D box 104	1.87154	3.65924	up	4.5764e-16	5.20305e-15
LOC729732	729732	uncharacterized LOC729732	2.99023	7.94599	up	2.15364e-15	2.16971e-14
SNHG8	100093630	small nucleolar RNA host gene 8	3.28987	9.78021	up	2.25471e-19	4.71059e-18
HOTAIR	100124700	HOX transcript antisense RNA	3.46601	11.0502	up	7.13539e-13	4.74319e-12
ZNF667-AS1	100128252	ZNF667 antisense RNA 1 (head to head)	1.7441	3.34985	up	9.29091e-10	3.78582e-09
GABPB1-AS1	100129387	GABPB1 antisense RNA 1	2.91515	7.54304	up	3.10349e-26	2.67639e-24
ZNF37BP	100129482	zinc finger protein 37B, pseudogene	1.84944	3.60361	up	3.29799e-15	3.2286e-14
MSC-AS1	100132891	MSC antisense RNA 1	2.21515	4.64329	up	2.9337e-12	1.77414e-11
TPT1-AS1	100190939	TPT1 antisense RNA 1	1.9022	3.73783	up	3.04028e-13	2.14626e-12
MIR1244-1	100302285	microRNA 1244-1	2.03052	4.08553	up	3.49055e-26	2.97731e-24
MIR181A2HG	100379345	MIR181A2 host gene	1.66856	3.17897	up	3.67601e-13	2.55707e-12
THAP9-AS1	100499177	THAP9 antisense RNA 1	2.52331	5.74901	up	1.76154e-18	3.11287e-17
ITGB2-AS1	100505746	ITGB2 antisense RNA 1	3.1554	8.90987	up	1.01682e-09	4.11631e-09
LOC100506076	100506076	uncharacterized LOC100506076	1.79969	3.48145	up	3.15953e-08	1.01916e-07
EBLN3P	100506710	endogenous Bornavirus-like nucleoprotein 3, pseudogene	2.2212	4.66282	up	1.26307e-21	4.14267e-20
TRG-AS1	100506776	T cell receptor gamma locus antisense RNA 1	1.6919	3.23083	up	0.00051835	0.000924387
PWAR6	100506965	Prader Willi/Angelman region RNA 6	2.09018	4.25802	up	1.44158e-07	4.23231e-07
SNHG19	100507303	small nucleolar RNA host gene 19	1.9001	3.73239	up	1.76076e-11	9.38302e-11
RNA45SN5	100861532	RNA, 45S pre-ribosomal N5	1.99795	3.99432	up	2.89436e-09	1.09273e-08
LINC01355	100996511	long intergenic non-protein coding RNA 1355	2.00402	4.01115	up	1.69095e-11	9.03829e-11
LOC100996732	100996732	uncharacterized LOC100996732	1.61738	3.06816	up	1.07259e-09	4.33021e-09
LOC101060398	101060398	uncharacterized LOC101060398	1.9148	3.77062	up	6.49854e-17	8.56989e-16
LOC101927027	101927027	uncharacterized LOC101927027	1.95372	3.87372	up	1.52066e-12	9.63408e-12
LOC102606465	102606465	uncharacterized LOC102606465	1.89028	3.70708	up	1.78172e-13	1.30322e-12
LOC102724701	102724701	uncharacterized LOC102724701	2.13848	4.40297	up	1.77856e-10	8.05324e-10
LOC105369360	105369360	uncharacterized LOC105369360	1.72101	3.29668	up	1.85228e-08	6.19221e-08
LOC105370109	105370109	uncharacterized LOC105370109	1.80133	3.4854	up	5.47325e-19	1.07104e-17
LOC105376059	105376059	uncharacterized LOC105376059	2.25154	4.76192	up	2.21619e-18	3.83086e-17
LOC105376066	105376066	uncharacterized LOC105376066	2.41521	5.33399	up	7.62939e-16	8.32941e-15
LOC105377320	105377320	uncharacterized LOC105377320	1.93997	3.83698	up	1.1311e-14	1.00869e-13
ENST00000331944.10	-	-	2.07879	4.22452	up	5.2018e-11	2.56918e-10
ENST00000371086.3	-	-	3.11381	8.65666	up	2.18532e-20	5.58799e-19
ENST00000371743.7	-	-	3.74519	13.4338	up	2.98881e-29	4.98865e-27
ENST00000425669.1	-	-	2.0801	4.22836	up	3.10338e-13	2.18685e-12
ENST00000430245.5	-	-	3.68129	12.8285	up	2.31367e-23	1.10096e-21
ENST00000431813.1	-	-	3.45232	10.9459	up	1.00555e-13	7.64335e-13
ENST00000442197.1	-	-	3.08896	8.50883	up	3.06453e-10	1.33647e-09
ENST00000448494.1	-	-	2.23074	4.69375	up	2.5072e-10	1.10755e-09
ENST00000454068.5	-	-	3.44137	10.8631	up	3.74837e-22	1.35723e-20
ENST00000499521.2	-	-	2.57911	5.97572	up	3.24631e-18	5.44955e-17
ENST00000499624.3	-	-	2.4311	6.07465	up	2.98288e-08	9.25922e-08
ENST00000556738.1	-	-	1.75429	3.37361	up	2.66063e-12	1.61903e-11
ENST00000562313.1	-	-	2.1915	4.5678	up	7.66876e-21	2.16017e-19
ENST00000564237.1	-	-	1.99061	3.97406	up	4.26699e-11	2.13349e-10
ENST00000568885.2	-	-	2.07003	4.19955	up	2.4286e-08	7.63453e-08
ENST00000575890.1	-	-	1.59457	3.02005	up	1.26029e-09	5.0271e-09
ENST00000581951.1	-	-	3.16189	8.95	up	7.96114e-13	5.25631e-12
ENST00000586466.5	-	-	2.36295	5.14422	up	3.98685e-17	5.46182e-16
ENST00000602414.5	-	-	3.28987	9.78021	up	2.25471e-19	4.71059e-18
ENST00000602458.1	-	-	1.8071	3.49938	up	1.05151e-17	1.59921e-16
ENST00000602516.1	-	-	1.65288	3.1446	up	5.34243e-17	7.17684e-16
ENST00000606384.1	-	-	1.87984	3.68034	up	1.90968e-18	3.35405e-17
ENST00000608095.1	-	-	1.59852	3.02832	up	3.63721e-13	2.53266e-12
ENST00000610525.1	-	-	1.84049	3.58131	up	5.45995e-08	1.7039e-07
ENST00000618270.1	-	-	1.75527	3.37591	up	7.62977e-08	2.3331e-07
ENST00000620594.1	-	-	4.18429	18.1801	up	8.56957e-29	1.30877e-26
ENST00000622714.1	-	-	4.17335	18.0428	up	3.72819e-22	1.35172e-20
NONHSAT001511.2	-	-	2.00402	4.01115	up	1.69095e-11	9.03829e-11
NONHSAT001973.2	-	-	2.79416	6.93626	up	2.68198e-22	1.00162e-20
NONHSAT004520.2	-	-	1.91136	3.86754	up	6.31583e-10	2.44629e-09
NONHSAT004835.2	-	-	1.89028	3.70708	up	1.78172e-13	1.30322e-12
NONHSAT006225.2	-	-	3.14087	10.3755	up	2.00839e-12	1.18866e-11
NONHSAT007676.2	-	-	3.14159	8.82497	up	7.55417e-25	4.87632e-23
NONHSAT022147.2	-	-	1.75123	3.36645	up	6.34226e-06	1.48063e-05
NONHSAT024787.2	-	-	1.7572	3.39147	up	3.80635e-05	7.96015e-05
NONHSAT028579.2	-	-	1.8031	3.4897	up	6.30024e-14	4.94851e-13
NONHSAT031029.2	-	-	1.75023	3.36413	up	7.3646e-14	5.70663e-13
NONHSAT032361.2	-	-	1.94155	3.84118	up	8.23083e-09	2.89607e-08
NONHSAT033305.2	-	-	3.18477	9.09306	up	4.13809e-15	3.98749e-14
NONHSAT033789.2	-	-	2.07861	4.22399	up	5.95524e-12	3.42019e-11
NONHSAT035482.2	-	-	3.89234	14.8495	up	1.81585e-12	1.13621e-11
NONHSAT037121.2	-	-	2.19307	4.57277	up	7.72229e-13	5.11096e-12
NONHSAT039751.2	-	-	2.77544	6.98059	up	5.17999e-08	1.55798e-07
NONHSAT039765.2	-	-	2.04523	4.1274	up	4.65707e-05	9.6314e-05
NONHSAT039768.2	-	-	3.33098	10.063	up	5.28803e-09	1.91308e-08
NONHSAT040991.2	-	-	2.09018	4.25802	up	1.44158e-07	4.23231e-07
NONHSAT042406.2	-	-	2.91515	7.54304	up	3.10349e-26	2.67639e-24
NONHSAT042416.2	-	-	3.10964	8.63169	up	8.30333e-14	6.37887e-13
NONHSAT047228.2	-	-	3.22341	9.33989	up	4.96069e-40	7.13753e-37
NONHSAT051904.2	-	-	2.14669	4.4281	up	3.77865e-11	1.90588e-10
NONHSAT054212.2	-	-	3.02937	8.16523	up	6.44689e-18	1.00447e-16
NONHSAT056426.2	-	-	3.28901	9.77443	up	6.78784e-24	3.64921e-22
NONHSAT060283.2	-	-	1.92589	3.82448	up	1.08236e-13	7.8123e-13
NONHSAT060371.2	-	-	1.90222	3.73787	up	8.49742e-12	4.76216e-11
NONHSAT068161.2	-	-	1.7441	3.34985	up	9.29091e-10	3.78582e-09
NONHSAT075542.2	-	-	1.99831	3.99533	up	1.41205e-19	3.07888e-18
NONHSAT076810.2	-	-	1.99183	3.97742	up	9.14072e-15	8.28529e-14
NONHSAT076871.2	-	-	1.7238	3.30306	up	4.08207e-07	1.12346e-06
NONHSAT079658.2	-	-	2.02661	4.11568	up	5.43438e-13	3.52483e-12
NONHSAT083938.2	-	-	1.81797	3.52585	up	1.70535e-14	1.47485e-13
NONHSAT084838.2	-	-	2.29098	5.01772	up	2.32418e-18	3.59892e-17
NONHSAT094090.2	-	-	1.98613	3.96174	up	1.46981e-18	2.63482e-17
NONHSAT094276.2	-	-	1.63134	3.09801	up	5.86699e-11	2.87281e-10
NONHSAT096458.2	-	-	2.54093	5.81963	up	3.14053e-24	1.79049e-22
NONHSAT097188.2	-	-	2.52331	5.74901	up	1.76154e-18	3.11287e-17
NONHSAT101948.2	-	-	5.81109	56.1452	up	2.02408e-28	2.77229e-26
NONHSAT101962.2	-	-	4.20799	20.7011	up	3.34932e-19	6.43218e-18
NONHSAT101975.2	-	-	2.62515	6.16949	up	7.49848e-11	3.61056e-10
NONHSAT102367.2	-	-	2.29864	4.91995	up	6.45348e-16	7.13537e-15
NONHSAT114681.2	-	-	1.94112	3.84003	up	2.5677e-16	3.04928e-15
NONHSAT115567.2	-	-	2.7399	6.68025	up	5.14956e-23	2.26146e-21
NONHSAT127201.2	-	-	2.21515	4.64329	up	2.9337e-12	1.77414e-11
NONHSAT127814.2	-	-	1.86973	3.65463	up	1.29738e-09	5.16223e-09
NONHSAT128404.2	-	-	2.13169	4.38231	up	3.16387e-14	2.61267e-13
NONHSAT129059.2	-	-	1.87329	3.66366	up	4.85781e-11	2.40951e-10
NONHSAT130285.2	-	-	2.24089	4.72687	up	5.41382e-06	1.27537e-05
NONHSAT131038.2	-	-	2.2212	4.66282	up	1.26307e-21	4.14267e-20
NONHSAT131053.2	-	-	2.50351	5.67062	up	4.96553e-20	1.18142e-18
NONHSAT134698.2	-	-	1.66856	3.17897	up	3.67601e-13	2.55707e-12
NONHSAT135577.2	-	-	2.11498	4.33183	up	8.54284e-13	5.6234e-12
NONHSAT137584.2	-	-	2.23244	4.69928	up	6.07696e-13	4.0843e-12
NONHSAT137608.2	-	-	1.90254	3.73871	up	1.15833e-11	6.34524e-11
NONHSAT137611.2	-	-	2.4328	5.39941	up	1.39895e-14	1.22674e-13
NONHSAT137623.2	-	-	2.26451	4.80493	up	1.1848e-15	1.24815e-14
NONHSAT138174.2	-	-	2.3229	5.00337	up	1.16467e-10	5.43105e-10
NONHSAT138802.2	-	-	2.03791	4.1065	up	9.01269e-06	2.05758e-05
NONHSAT141904.2	-	-	2.04164	4.11713	up	1.05552e-15	1.12102e-14
NONHSAT144632.2	-	-	1.58827	3.00688	up	4.44219e-12	2.60653e-11
NONHSAT149054.1	-	-	1.96783	3.9118	up	1.36269e-14	1.19764e-13
NONHSAT151803.1	-	-	2.1272	4.3687	up	3.65197e-14	2.98999e-13
NONHSAT152377.1	-	-	1.72063	3.2958	up	2.36108e-13	1.69568e-12
NONHSAT152561.1	-	-	4.37825	20.7962	up	1.51896e-25	1.12839e-23
NONHSAT155016.1	-	-	2.36397	5.14784	up	2.31946e-21	7.26326e-20
NONHSAT155735.1	-	-	2.94539	7.70284	up	7.12053e-16	7.8113e-15
NONHSAT156816.1	-	-	1.90307	3.74008	up	7.40521e-12	4.19217e-11
NONHSAT158891.1	-	-	2.28537	4.87491	up	2.69802e-16	3.19087e-15
NONHSAT160390.1	-	-	2.60016	6.06356	up	3.66167e-15	3.55725e-14
NONHSAT163268.1	-	-	1.64015	3.11699	up	1.92339e-10	8.66238e-10
NONHSAT163579.1	-	-	3.46601	11.0502	up	7.13539e-13	4.74319e-12
NONHSAT165295.1	-	-	3.02914	8.16325	up	2.93112e-20	7.26799e-19
NONHSAT165655.1	-	-	1.9022	3.73783	up	3.04028e-13	2.14626e-12
NONHSAT166626.1	-	-	6.35468	81.8367	up	5.85169e-19	1.13858e-17
NONHSAT166664.1	-	-	1.73821	3.33621	up	8.46126e-13	5.57372e-12
NONHSAT170778.1	-	-	2.88226	7.37306	up	1.36837e-12	8.73909e-12
NONHSAT173516.1	-	-	1.9001	3.73239	up	1.76076e-11	9.38302e-11
NONHSAT174075.1	-	-	2.68735	6.4413	up	1.88144e-12	1.17455e-11
NONHSAT176128.1	-	-	1.77435	3.42085	up	3.93078e-15	3.80449e-14
NONHSAT177308.1	-	-	1.80547	3.49543	up	1.02902e-15	1.09438e-14
NONHSAT179714.1	-	-	1.96448	3.90273	up	8.429e-14	6.47087e-13
NONHSAT183360.1	-	-	2.05116	4.28705	up	1.75984e-12	1.05125e-11
NONHSAT183952.1	-	-	2.07407	4.21072	up	1.75739e-07	5.0917e-07
NONHSAT185113.1	-	-	1.84444	3.59113	up	5.58549e-11	2.74382e-10
NONHSAT185150.1	-	-	1.79969	3.48145	up	3.15953e-08	1.01916e-07
NONHSAT189609.1	-	-	2.25745	4.78145	up	7.80959e-19	1.47492e-17
NONHSAT191069.1	-	-	3.1554	8.90987	up	1.01682e-09	4.11631e-09
NONHSAT191081.1	-	-	1.92943	3.80905	up	2.12475e-13	1.53502e-12
NONHSAT198799.1	-	-	1.62898	3.09294	up	1.71562e-11	9.15943e-11
NONHSAT199619.1	-	-	1.818	3.52593	up	4.65883e-13	3.188e-12
NONHSAT200455.1	-	-	1.9862	3.96193	up	8.08209e-12	4.54431e-11
NONHSAT201201.1	-	-	2.13909	4.40484	up	8.65041e-07	2.27494e-06
NONHSAT202346.1	-	-	5.43184	43.1665	up	1.08299e-25	8.32809e-24
NONHSAT203034.1	-	-	1.7349	3.32857	up	1.03572e-10	4.87457e-10
NONHSAT203042.1	-	-	3.57978	11.957	up	1.70208e-19	3.64375e-18
NONHSAT204282.1	-	-	4.35781	20.5037	up	3.11012e-20	7.68396e-19
NONHSAT204283.1	-	-	4.34824	20.3681	up	1.43436e-21	4.66807e-20
NONHSAT204426.1	-	-	1.64879	3.1357	up	0.000308723	0.000567662
NONHSAT208316.1	-	-	1.83992	3.57989	up	2.29155e-08	7.55719e-08
NONHSAT209389.1	-	-	3.07845	8.44706	up	3.64588e-24	2.0424e-22
NONHSAT211817.1	-	-	1.99391	3.98316	up	1.9627e-14	1.6812e-13
NONHSAT211961.1	-	-	1.6919	3.23083	up	0.00051835	0.000924387
NONHSAT213341.1	-	-	1.69346	3.23432	up	1.53323e-10	7.0197e-10
NONHSAT215362.1	-	-	1.72101	3.29668	up	1.85228e-08	6.19221e-08
NONHSAT216838.1	-	-	2.08598	4.24563	up	1.41589e-19	3.08544e-18
NONHSAT217791.1	-	-	1.9779	3.9392	up	2.0744e-20	5.32729e-19
NONHSAT217892.1	-	-	2.99023	7.94599	up	2.15364e-15	2.16971e-14
NONHSAT219522.1	-	-	2.41521	5.33399	up	7.62939e-16	8.32941e-15
NONHSAT220276.1	-	-	2.97357	7.85476	up	7.46465e-16	8.16913e-15
NONHSAT221847.1	-	-	1.97281	3.92533	up	1.40109e-10	6.46014e-10
NONHSAT224435.1	-	-	2.73342	6.65029	up	1.00468e-16	1.28343e-15
NR_002186.1	-	-	1.78791	3.45315	up	5.09407e-13	3.46445e-12
NR_002765.2	-	-	1.59413	3.01911	up	2.31632e-13	1.66441e-12
NR_003573.1	-	-	1.59678	3.02468	up	3.25764e-10	1.4147e-09
NR_003682.1	-	-	1.60731	3.04683	up	2.90889e-11	1.49603e-10
NR_026052.1	-	-	2.0743	4.2114	up	9.63141e-17	1.23267e-15
NR_026804.1	-	-	1.96479	3.90357	up	1.61869e-06	4.10567e-06
NR_033327.1	-	-	3.02479	8.13863	up	5.94308e-22	2.06572e-20
NR_075079.1	-	-	2.18345	4.54238	up	4.56207e-22	1.6239e-20
XR_250839.3	-	-	1.61738	3.06816	up	1.07259e-09	4.33021e-09
XR_917205.1	-	-	1.9148	3.77062	up	6.49854e-17	8.56989e-16
XR_917231.1	-	-	2.53188	5.78326	up	4.74402e-18	7.68988e-17
XR_923947.1	-	-	1.86438	3.64113	up	1.48094e-16	1.82984e-15
XR_928645.1	-	-	1.93648	3.82771	up	7.55926e-15	6.95094e-14
XR_929661.1	-	-	2.25154	4.76192	up	2.21619e-18	3.83086e-17
XR_929725.1	-	-	3.12838	8.74453	up	4.06433e-26	3.40824e-24
XR_933494.1	-	-	1.86759	3.64924	up	2.57299e-05	5.51073e-05
XR_946662.1	-	-	2.09135	4.26147	up	1.04052e-17	1.58337e-16
Downregulated DELs
LncRNA	LncRNA ID	LncRNA Description	LogFC	Fold Change	Style	P.Value	adj.P.Value
NPY6R	4888	neuropeptide Y receptor Y6 (pseudogene)	-2.30634	0.210694	down	8.60156e-27	8.05903e-25
XIST	7503	X inactive specific transcript (non-protein coding)	-2.40715	0.18901	down	0.00547018	0.00840995
OR7E47P	26628	olfactory receptor family 7 subfamily E member 47 pseudogene	-2.44441	0.183721	down	3.3127e-27	3.46313e-25
LINC00312	29931	long intergenic non-protein coding RNA 312	-2.1922	0.218817	down	9.1149e-15	8.26625e-14
IDI2-AS1	55853	IDI2 antisense RNA 1	-2.19152	0.218921	down	2.09137e-25	1.49863e-23
LINC01854	151121	long intergenic non-protein coding RNA 1854	-2.6037	0.164516	down	5.21439e-18	8.38273e-17
H19	283120	H19, imprinted maternally expressed transcript (non-protein coding)	-1.98987	0.254498	down	1.95401e-05	4.22615e-05
NEAT1	283131	nuclear paraspeckle assembly transcript 1 (non-protein coding)	-1.86527	0.277114	down	5.18443e-07	1.35636e-06
LOC283140	283140	uncharacterized LOC283140	-1.88673	0.27042	down	5.43733e-13	3.6811e-12
LINC00491	285708	long intergenic non-protein coding RNA 491	-2.33085	0.198766	down	6.83996e-24	3.67362e-22
FAM86B3P	286042	family with sequence similarity 86, member A pseudogene	-1.86207	0.275082	down	5.14832e-13	3.49757e-12
RNF144A-AS1	386597	RNF144A antisense RNA 1	-1.63331	0.322348	down	7.27873e-19	1.38519e-17
SOX9-AS1	400618	SOX9 antisense RNA 1	-2.72144	0.151623	down	1.74298e-21	5.59259e-20
MBNL1-AS1	401093	MBNL1 antisense RNA 1	-4.5122	0.0441353	down	5.28578e-38	5.07346e-35
PRKCQ-AS1	439949	PRKCQ antisense RNA 1	-2.59441	0.182655	down	6.11522e-24	3.0987e-22
LOC642862	642862	Ras homolog, mTORC1 binding pseudogene	-2.53083	0.173039	down	1.71993e-19	3.67619e-18
LOC646736	646736	uncharacterized LOC646736	-1.92607	0.263145	down	7.29233e-19	1.38681e-17
LOC646903	646903	uncharacterized LOC646903	-2.50857	0.17573	down	3.4307e-18	5.72744e-17
PWRN1	791114	Prader-Willi region non-protein coding RNA 1	-2.08216	0.236161	down	4.43302e-23	1.98019e-21
STAU2-AS1	100128126	STAU2 antisense RNA 1	-1.70322	0.307099	down	4.74023e-25	3.20361e-23
MIR29B2CHG	100128537	MIR29B2 and MIR29C host gene	-3.83358	0.0701417	down	6.61026e-18	1.04468e-16
LINC01405	100131138	long intergenic non-protein coding RNA 1405	-4.35692	0.048802	down	1.27573e-14	1.12737e-13
LOC100288911	100288911	uncharacterized LOC100288911	-1.98874	0.251959	down	3.21215e-14	2.65013e-13
LOC100419741	100419741	zinc finger protein 772 pseudogene	-1.71375	0.304867	down	5.18375e-16	5.82094e-15
LINC00888	100505687	long intergenic non-protein coding RNA 888	-2.75373	0.148267	down	1.29605e-19	2.83901e-18
LOC100506114	100506114	uncharacterized LOC100506114	-2.54225	0.171675	down	2.94878e-28	3.84555e-26
C10orf71-AS1	100506769	C10orf71 antisense RNA 1	-2.98442	0.126357	down	8.1368e-36	5.17302e-33
TTN-AS1	100506866	TTN antisense RNA 1	-1.63639	0.321661	down	1.28004e-10	5.93507e-10
LINC00844	100507008	long intergenic non-protein coding RNA 844	-1.99728	0.250471	down	4.36565e-10	1.8642e-09
SLFNL1-AS1	100507178	SLFNL1 antisense RNA 1	-1.75643	0.295979	down	1.21483e-25	9.28961e-24
LINC00943	100507206	long intergenic non-protein coding RNA 943	-1.61134	0.327294	down	2.59736e-18	4.43784e-17
LINC01210	100507274	long intergenic non-protein coding RNA 1210	-2.29839	0.20329	down	2.71764e-32	8.95101e-30
LOC100507477	100507477	uncharacterized LOC100507477	-3.00505	0.124564	down	3.97201e-20	9.66281e-19
NNT-AS1	100652772	NNT antisense RNA 1	-2.02943	0.244953	down	2.71467e-13	1.9306e-12
LINC01676	101928476	long intergenic non-protein coding RNA 1676	-1.68293	0.31145	down	1.43203e-15	1.48909e-14
LOC101928896	101928896	uncharacterized LOC101928896	-1.88294	0.271131	down	3.1684e-22	1.16655e-20
LOC101929592	101929592	uncharacterized LOC101929592	-4.06657	0.0596815	down	1.11555e-26	1.04619e-24
MIR133A1HG	102723167	MIR133A1 host gene	-5.11487	0.0349096	down	4.61887e-26	3.60838e-24
LOC102724532	102724532	uncharacterized LOC102724532	-2.37561	0.192695	down	1.20641e-30	2.78313e-28
ENST00000345111.3	-	-	-1.61134	0.327294	down	2.59736e-18	4.43784e-17
ENST00000420724.1	-	-	-2.16886	0.222386	down	6.59722e-25	4.32871e-23
ENST00000456053.5	-	-	-1.63639	0.321661	down	1.28004e-10	5.93507e-10
ENST00000515178.1	-	-	-1.71375	0.304867	down	5.18375e-16	5.82094e-15
ENST00000522388.1	-	-	-1.76694	0.293831	down	7.33149e-17	9.59199e-16
ENST00000563761.1	-	-	-2.99172	0.125719	down	2.9577e-28	3.84555e-26
ENST00000564487.1	-	-	-1.91409	0.265338	down	8.42163e-20	1.91456e-18
ENST00000581072.5	-	-	-6.03356	0.0152657	down	1.44247e-29	2.54922e-27
ENST00000588041.1	-	-	-2.06676	0.238696	down	1.3923e-12	8.88259e-12
ENST00000591665.1	-	-	-1.59906	0.330091	down	5.41671e-27	5.39451e-25
ENST00000610269.1	-	-	-2.09642	0.233838	down	7.3902e-24	3.93436e-22
NONHSAT005841.2	-	-	-4.7989	0.0359241	down	3.08586e-36	2.31123e-33
NONHSAT006227.2	-	-	-4.06632	0.059692	down	1.0047e-25	7.81393e-24
NONHSAT009146.2	-	-	-3.83358	0.0701417	down	6.61026e-18	1.04468e-16
NONHSAT010892.2	-	-	-2.19152	0.218921	down	2.09137e-25	1.49863e-23
NONHSAT011233.2	-	-	-3.24411	0.105542	down	5.27698e-31	1.34195e-28
NONHSAT011234.2	-	-	-1.9447	0.259769	down	1.22304e-23	6.1974e-22
NONHSAT013506.2	-	-	-1.99728	0.250471	down	4.36565e-10	1.8642e-09
NONHSAT015621.2	-	-	-2.5847	0.166697	down	4.04456e-21	1.20248e-19
NONHSAT017727.2	-	-	-2.29239	0.204137	down	7.38763e-22	2.51193e-20
NONHSAT018008.2	-	-	-5.71148	0.0190842	down	2.11603e-43	5.78469e-40
NONHSAT022109.2	-	-	-2.0653	0.238936	down	1.26034e-08	4.3133e-08
NONHSAT022110.2	-	-	-1.66524	0.315293	down	1.02428e-06	2.66959e-06
NONHSAT024206.2	-	-	-1.88673	0.27042	down	5.43733e-13	3.6811e-12
NONHSAT030711.2	-	-	-4.35692	0.048802	down	1.27573e-14	1.12737e-13
NONHSAT054339.2	-	-	-2.37561	0.192695	down	1.20641e-30	2.78313e-28
NONHSAT064214.2	-	-	-2.58697	0.166435	down	4.94162e-25	3.33148e-23
NONHSAT068926.2	-	-	-1.63331	0.322348	down	7.27873e-19	1.38519e-17
NONHSAT072590.2	-	-	-1.95193	0.258471	down	3.64322e-15	3.54184e-14
NONHSAT092665.2	-	-	-2.50857	0.17573	down	3.4307e-18	5.72744e-17
NONHSAT093645.2	-	-	-2.93479	0.13078	down	5.73084e-29	9.08214e-27
NONHSAT093647.2	-	-	-2.75373	0.148267	down	1.29605e-19	2.83901e-18
NONHSAT101320.2	-	-	-2.02943	0.244953	down	2.71467e-13	1.9306e-12
NONHSAT103032.2	-	-	-2.33085	0.198766	down	6.83996e-24	3.67362e-22
NONHSAT122348.2	-	-	-1.97058	0.25515	down	4.39911e-17	5.98312e-16
NONHSAT137545.2	-	-	-2.29716	0.203463	down	0.00521661	0.00804248
NONHSAT141388.2	-	-	-1.80684	0.285815	down	2.15059e-26	1.92444e-24
NONHSAT150038.1	-	-	-2.21313	0.215666	down	1.18199e-08	4.06066e-08
NONHSAT150653.1	-	-	-1.66317	0.315745	down	5.13272e-27	5.12101e-25
NONHSAT151648.1	-	-	-2.10184	0.232961	down	5.76776e-15	5.43993e-14
NONHSAT152034.1	-	-	-1.68293	0.31145	down	1.43203e-15	1.48909e-14
NONHSAT153109.1	-	-	-1.64134	0.320559	down	5.49479e-25	3.66375e-23
NONHSAT155052.1	-	-	-1.62199	0.324887	down	9.10111e-25	5.77266e-23
NONHSAT156998.1	-	-	-2.98442	0.126357	down	8.1368e-36	5.17302e-33
NONHSAT170523.1	-	-	-2.08216	0.236161	down	4.43302e-23	1.98019e-21
NONHSAT171169.1	-	-	-3.56882	0.0842712	down	1.77851e-26	1.6126e-24
NONHSAT183602.1	-	-	-1.61609	0.326219	down	1.08248e-22	4.42004e-21
NONHSAT185527.1	-	-	-2.6037	0.164516	down	5.21439e-18	8.38273e-17
NONHSAT193367.1	-	-	-1.98874	0.251959	down	3.21215e-14	2.65013e-13
NONHSAT194521.1	-	-	-2.29839	0.20329	down	2.71764e-32	8.95101e-30
NONHSAT196441.1	-	-	-4.33975	0.049386	down	1.05622e-37	1.01313e-34
NONHSAT196845.1	-	-	-1.80903	0.285382	down	5.30827e-15	5.02823e-14
NONHSAT208140.1	-	-	-3.00505	0.124564	down	3.97201e-20	9.66281e-19
NONHSAT215968.1	-	-	-1.70322	0.307099	down	4.74023e-25	3.20361e-23
NONHSAT216320.1	-	-	-2.19171	0.218892	down	1.74271e-11	9.29406e-11
NONHSAT223415.1	-	-	-2.46214	0.181783	down	0.00559696	0.00859369
NR_002713.3	-	-	-2.30634	0.210694	down	8.60156e-27	8.05903e-25
NR_024361.1	-	-	-1.86207	0.275082	down	5.14832e-13	3.49757e-12
NR_033663.1	-	-	-1.65042	0.318547	down	5.11909e-23	2.2517e-21
NR_037868.1	-	-	-1.75643	0.295979	down	1.21483e-25	9.28961e-24
NR_046102.1	-	-	-1.92607	0.263145	down	7.29233e-19	1.38681e-17
NR_120566.1	-	-	-1.88294	0.271131	down	3.1684e-22	1.16655e-20
NR_125986.1	-	-	-4.06657	0.0596815	down	1.11555e-26	1.04619e-24
XR_917622.1	-	-	-4.42993	0.0463938	down	3.46268e-26	2.95816e-24
XR_958289.1	-	-	-1.66242	0.315909	down	1.31758e-23	6.62122e-22
